# Supplementary material for: Crystal Growth of the R2SiO5 Compounds (R = Dy, Ho, and Er) by the Floating Zone Method Using a Laser-Diode-Heated Furnace
Source: MDPI journal article supplement (doi:10.3390/cryst13121687), 2023-12-14
Supplement: s1 [file s1]

# Supplementary Materials: Crystal growth of the $R_2\text{SiO}_5$ compounds ( $R = \text{Dy, Ho, and Er}$ ) by the floating zone method using a laser-diode-heated furnace

Vasile Cristian Ciomaga Hatnean <sup>1,2</sup> , Aurel Pui <sup>1</sup> , Arkadiy Simonov <sup>2</sup>  and Monica Ciomaga Hatnean <sup>3,4,\*</sup> 

## 1. Crystal data for $\text{Dy}_2\text{SiO}_5$

**Table S1.** Crystal parameters refined from the room temperature single crystal X-ray diffraction data collected on a crystal piece isolated from the as-grown  $\text{Dy}_2\text{SiO}_5$  crystal boule.

| Chemical composition                                    | $\text{Dy}_2\text{SiO}_5$            |            |            |             |                                                     |
|---------------------------------------------------------|--------------------------------------|------------|------------|-------------|-----------------------------------------------------|
| Origin                                                  | as-grown crystal fragment            |            |            |             |                                                     |
| Crystal system                                          | Monoclinic                           |            |            |             |                                                     |
| Space group                                             | $I2/a$ (No. 15)                      |            |            |             |                                                     |
| $a$ (Å)                                                 | 10.4642(2)                           |            |            |             |                                                     |
| $b$ (Å)                                                 | 6.7498(1)                            |            |            |             |                                                     |
| $c$ (Å)                                                 | 12.5396(3)                           |            |            |             |                                                     |
| $\beta$ (°)                                             | 102.740(2)                           |            |            |             |                                                     |
| $V$ (Å <sup>3</sup> )                                   | 863.88(3)                            |            |            |             |                                                     |
| $Z$                                                     | 8                                    |            |            |             |                                                     |
| Radiation, wavelength                                   | Mo $K\alpha$ , $\lambda = 0.71073$ Å |            |            |             |                                                     |
| Temperature (K)                                         | 298                                  |            |            |             |                                                     |
| Linear absorption coefficient (mm <sup>−1</sup> )       | 25.887                               |            |            |             |                                                     |
| No. of reflections measured (excl. systematic absences) | 14350                                |            |            |             |                                                     |
| No. of reflections used in refinement                   | 1152                                 |            |            |             |                                                     |
| No. of parameters refined                               | 49                                   |            |            |             |                                                     |
| R1                                                      | 0.0341                               |            |            |             |                                                     |
| wR2                                                     | 0.0692                               |            |            |             |                                                     |
| Goodness of fit (GOF)                                   | 1.0248                               |            |            |             |                                                     |
| Atomic site                                             | Wyckoff position                     | $x$<br>(Å) | $y$<br>(Å) | $z$<br>(Å)  | $U_{\text{iso}}/U_{\text{eq}}$<br>(Å <sup>2</sup> ) |
| Dy1                                                     | 8f                                   | 0.80746(3) | 0.37577(5) | 0.64171(3)  | 0.01014(14)                                         |
| Dy2                                                     | 8f                                   | 0.42762(3) | 0.25447(5) | 0.46294(3)  | 0.00962(14)                                         |
| Si                                                      | 8f                                   | 0.6272(2)  | 0.5896(3)  | 0.81908(17) | 0.0091(4)                                           |
| O1                                                      | 8f                                   | 0.6212(5)  | 0.4049(8)  | 0.5181(4)   | 0.0118(11)                                          |
| O2                                                      | 8f                                   | 0.7000(5)  | 0.7858(8)  | 0.8818(5)   | 0.0111(11)                                          |
| O3                                                      | 8f                                   | 0.5298(5)  | 0.6441(8)  | 0.7041(4)   | 0.0116(11)                                          |
| O4                                                      | 8f                                   | 0.7389(6)  | 0.4333(9)  | 0.8005(5)   | 0.0138(11)                                          |
| O5                                                      | 8f                                   | 0.5538(5)  | 0.4982(8)  | 0.9103(4)   | 0.0139(11)                                          |

**Table S2.** Anisotropic displacement parameters obtained for the Dy and Si sites from the room temperature single crystal X-ray diffraction data collected on a crystal piece isolated from the as-grown  $\text{Dy}_2\text{SiO}_5$  crystal boule.

| Atomic site | $U_{11}$<br>(Å <sup>2</sup> ) | $U_{22}$<br>(Å <sup>2</sup> ) | $U_{33}$<br>(Å <sup>2</sup> ) | $U_{12}$<br>(Å <sup>2</sup> ) | $U_{13}$<br>(Å <sup>2</sup> ) | $U_{23}$<br>(Å <sup>2</sup> ) |
|-------------|-------------------------------|-------------------------------|-------------------------------|-------------------------------|-------------------------------|-------------------------------|
| Dy1         | 0.0098(2)                     | 0.0113(2)                     | 0.0094(2)                     | 0.00033(12)                   | 0.00227(13)                   | 0.00141(12)                   |
| Dy2         | 0.0097(2)                     | 0.0099(2)                     | 0.0096(2)                     | 0.00046(12)                   | 0.00274(14)                   | 0.00098(12)                   |
| Si          | 0.0082(9)                     | 0.0102(10)                    | 0.0089(9)                     | −0.0008(7)                    | 0.0019(7)                     | 0.0008(7)                     |

**Table S3.** Characteristics of the polyhedra formed around the Dy and Si, obtained from the room temperature single crystal X-ray diffraction data collected on a crystal piece isolated from the as-grown Dy<sub>2</sub>SiO<sub>5</sub> crystal boule. Data were obtained from VESTA software.

|                                          | Dy1O <sub>6</sub> | Dy2O <sub>7</sub> | SiO <sub>4</sub> |
|------------------------------------------|-------------------|-------------------|------------------|
| Average bond length (Å)                  | 2.2819            | 2.3720            | 1.6289           |
| Polyhedral volume (Å <sup>3</sup> )      | 14.7349           | 19.0315           | 2.2041           |
| Distortion index (bond length)           | 0.00973           | 0.02984           | 0.00459          |
| Quadratic elongation                     | 1.0497            | -                 | 1.0042           |
| Bond angle variance (deg. <sup>2</sup> ) | 175.8383          | -                 | 17.4776          |
| Effective coordination number            | 5.9569            | 6.4942            | 3.9953           |
| Bond valence sum                         | 2.925             | 3.097             | 3.949            |

  

| Dy1O <sub>6</sub> |                 | Dy2O <sub>7</sub> |                 | SiO <sub>4</sub> |                 |
|-------------------|-----------------|-------------------|-----------------|------------------|-----------------|
| Bond              | Bond length (Å) | Bond              | Bond length (Å) | Bond             | Bond length (Å) |
| Dy1-O1            | 2.215(5)        | Dy2-O1            | 2.235(6)        | Si-O3            | 1.614(5)        |
| Dy1-O3            | 2.289(5)        | Dy2-O5            | 2.328(6)        | Si-O4            | 1.629(7)        |
| Dy1-O4            | 2.294(7)        | Dy2-O3            | 2.338(6)        | Si-O5            | 1.633(7)        |
| Dy1-O4            | 2.295(7)        | Dy2-O5            | 2.339(6)        | Si-O2            | 1.640(6)        |
| Dy1-O1            | 2.296(6)        | Dy2-O1            | 2.379(6)        |                  |                 |
| Dy1-O2            | 2.302(6)        | Dy2-O2            | 2.384(5)        |                  |                 |
|                   |                 | Dy2-O2            | 2.601(7)        |                  |                 |

**Table S4.** Crystal parameters refined from the room temperature single crystal X-ray diffraction data collected on a crystal piece isolated from the Dy<sub>2</sub>SiO<sub>5</sub> crystal fragment annealed in air, at 950 °C, for 30 days.

|                                                         |  |                                       |  |  |  |
|---------------------------------------------------------|--|---------------------------------------|--|--|--|
| Chemical composition                                    |  | Dy <sub>2</sub> SiO <sub>5</sub>      |  |  |  |
| Origin                                                  |  | annealed crystal fragment             |  |  |  |
| Crystal system                                          |  | Monoclinic                            |  |  |  |
| Space group                                             |  | <i>I</i> 2/ <i>a</i> (No. 15)         |  |  |  |
| <i>a</i> (Å)                                            |  | 10.4617(3)                            |  |  |  |
| <i>b</i> (Å)                                            |  | 6.7484(2)                             |  |  |  |
| <i>c</i> (Å)                                            |  | 12.5382(3)                            |  |  |  |
| $\beta$ (°)                                             |  | 102.748(3)                            |  |  |  |
| <i>V</i> (Å <sup>3</sup> )                              |  | 863.37(4)                             |  |  |  |
| <i>Z</i>                                                |  | 8                                     |  |  |  |
| Radiation, wavelength                                   |  | Mo K $\alpha$ , $\lambda$ = 0.71073 Å |  |  |  |
| Temperature (K)                                         |  | 298                                   |  |  |  |
| Linear absorption coefficient (mm <sup>−1</sup> )       |  | 25.902                                |  |  |  |
| No. of reflections measured (excl. systematic absences) |  | 9051                                  |  |  |  |
| No. of reflections used in refinement                   |  | 1113                                  |  |  |  |
| No. of parameters refined                               |  | 49                                    |  |  |  |
| R1                                                      |  | 0.0342                                |  |  |  |
| wR2                                                     |  | 0.0656                                |  |  |  |
| Goodness of fit (GOF)                                   |  | 1.0130                                |  |  |  |

  

| Atomic site | Wyckoff position | <i>x</i><br>(Å) | <i>y</i><br>(Å) | <i>z</i><br>(Å) | <i>U</i> <sub>iso</sub> / <i>U</i> <sub>eq</sub><br>(Å <sup>2</sup> ) |
|-------------|------------------|-----------------|-----------------|-----------------|-----------------------------------------------------------------------|
| Dy1         | 8 <i>f</i>       | 0.19259(3)      | 0.37579(5)      | 0.35828(3)      | 0.00991(14)                                                           |
| Dy2         | 8 <i>f</i>       | 0.57236(3)      | 0.25451(5)      | 0.53703(3)      | 0.00936(14)                                                           |
| Si          | 8 <i>f</i>       | 0.3729(2)       | 0.5896(3)       | 0.18066(16)     | 0.0087(4)                                                             |
| O1          | 8 <i>f</i>       | 0.3793(5)       | 0.4057(8)       | 0.4818(4)       | 0.0105(11)                                                            |
| O2          | 8 <i>f</i>       | 0.3003(5)       | 0.7862(8)       | 0.1178(4)       | 0.0098(11)                                                            |
| O3          | 8 <i>f</i>       | 0.4692(5)       | 0.6444(8)       | 0.2957(4)       | 0.0115(11)                                                            |
| O4          | 8 <i>f</i>       | 0.4463(5)       | 0.4983(8)       | 0.0903(4)       | 0.0133(11)                                                            |
| O5          | 8 <i>f</i>       | 0.2613(6)       | 0.4340(8)       | 0.1998(5)       | 0.0134(11)                                                            |

**Table S5.** Anisotropic displacement parameters obtained for the Dy and Si sites from the room temperature single crystal X-ray diffraction data collected on a crystal piece isolated from the Dy<sub>2</sub>SiO<sub>5</sub> crystal fragment annealed in air, at 950 °C, for 30 days.

| Atomic site | $U_{11}$<br>(Å <sup>2</sup> ) | $U_{22}$<br>(Å <sup>2</sup> ) | $U_{33}$<br>(Å <sup>2</sup> ) | $U_{12}$<br>(Å <sup>2</sup> ) | $U_{13}$<br>(Å <sup>2</sup> ) | $U_{23}$<br>(Å <sup>2</sup> ) |
|-------------|-------------------------------|-------------------------------|-------------------------------|-------------------------------|-------------------------------|-------------------------------|
| Dy1         | 0.0092(2)                     | 0.0114(2)                     | 0.0090(2)                     | -0.00033(13)                  | 0.00181(14)                   | -0.00152(13)                  |
| Dy2         | 0.0088(2)                     | 0.0100(2)                     | 0.0094(2)                     | -0.00060(12)                  | 0.00220(14)                   | -0.00090(12)                  |
| Si          | 0.0086(10)                    | 0.0099(9)                     | 0.0075(9)                     | 0.0003(7)                     | 0.0017(8)                     | -0.0007(7)                    |

**Table S6.** Characteristics of the polyhedra formed around the Dy and Si, obtained from the room temperature single crystal X-ray diffraction data collected on a crystal piece isolated from the as-grown Dy<sub>2</sub>SiO<sub>5</sub> crystal boule. Data were obtained from VESTA software.

|                                          | Dy1O <sub>6</sub>  |        | Dy2O <sub>7</sub>  | SiO <sub>4</sub> |                    |
|------------------------------------------|--------------------|--------|--------------------|------------------|--------------------|
| Average bond length (Å)                  | 2.2847             |        | 2.3705             | 1.6254           |                    |
| Polyhedral volume (Å <sup>3</sup> )      | 14.7837            |        | 18.9915            | 2.1905           |                    |
| Distortion index (bond length)           | 0.00974            |        | 0.02891            | 0.00536          |                    |
| Quadratic elongation                     | 1.0500             |        | -                  | 1.0041           |                    |
| Bond angle variance (deg. <sup>2</sup> ) | 176.6457           |        | -                  | 17.0882          |                    |
| Effective coordination number            | 5.9570             |        | 6.5037             | 3.9932           |                    |
| Bond valence sum                         | 3.074              |        | 2.934              | 3.986            |                    |
|                                          | Dy1O <sub>6</sub>  |        | Dy2O <sub>7</sub>  |                  | SiO <sub>4</sub>   |
| Bond                                     | Bond length<br>(Å) | Bond   | Bond length<br>(Å) | Bond             | Bond length<br>(Å) |
| Dy1-O1                                   | 2.218(5)           | Dy2-O1 | 2.232(6)           | Si-O3            | 1.610(5)           |
| Dy1-O5                                   | 2.291(7)           | Dy2-O4 | 2.332(6)           | Si-O4            | 1.624(7)           |
| Dy1-O3                                   | 2.299(5)           | Dy2-O3 | 2.336(6)           | Si-O5            | 1.627(7)           |
| Dy1-O5                                   | 2.300(6)           | Dy2-O4 | 2.342(6)           | Si-O2            | 1.641(6)           |
| Dy1-O2                                   | 2.300(6)           | Dy2-O1 | 2.371(6)           |                  |                    |
| Dy1-O1                                   | 2.301(6)           | Dy2-O2 | 2.386(5)           |                  |                    |
|                                          |                    | Dy2-O2 | 2.594(6)           |                  |                    |

## 2. Crystal data for Ho<sub>2</sub>SiO<sub>5</sub>

**Table S7.** Crystal parameters refined from the room temperature single crystal X-ray diffraction data collected on a crystal piece isolated from the as-grown Ho<sub>2</sub>SiO<sub>5</sub> crystal boule.

| Chemical composition                                    | Ho <sub>2</sub> SiO <sub>5</sub>      |                 |                 |                 |                                                                       |
|---------------------------------------------------------|---------------------------------------|-----------------|-----------------|-----------------|-----------------------------------------------------------------------|
| Origin                                                  | as-grown crystal fragment             |                 |                 |                 |                                                                       |
| Crystal system                                          | Monoclinic                            |                 |                 |                 |                                                                       |
| Space group                                             | <i>I</i> 2/ <i>a</i> (No. 15)         |                 |                 |                 |                                                                       |
| <i>a</i> (Å)                                            | 10.4156(2)                            |                 |                 |                 |                                                                       |
| <i>b</i> (Å)                                            | 6.7273(1)                             |                 |                 |                 |                                                                       |
| <i>c</i> (Å)                                            | 12.5019(3)                            |                 |                 |                 |                                                                       |
| $\beta$ (°)                                             | 102.630(2)                            |                 |                 |                 |                                                                       |
| <i>V</i> (Å <sup>3</sup> )                              | 854.80(3)                             |                 |                 |                 |                                                                       |
| <i>Z</i>                                                | 8                                     |                 |                 |                 |                                                                       |
| Radiation, wavelength                                   | Mo K $\alpha$ , $\lambda$ = 0.71073 Å |                 |                 |                 |                                                                       |
| Temperature (K)                                         | 298                                   |                 |                 |                 |                                                                       |
| Linear absorption coefficient (mm <sup>−1</sup> )       | 27.706                                |                 |                 |                 |                                                                       |
| No. of reflections measured (excl. systematic absences) | 10695                                 |                 |                 |                 |                                                                       |
| No. of reflections used in refinement                   | 1129                                  |                 |                 |                 |                                                                       |
| No. of parameters refined                               | 49                                    |                 |                 |                 |                                                                       |
| R1                                                      | 0.0294                                |                 |                 |                 |                                                                       |
| wR2                                                     | 0.0648                                |                 |                 |                 |                                                                       |
| Goodness of fit (GOF)                                   | 1.0116                                |                 |                 |                 |                                                                       |
| Atomic site                                             | Wyckoff position                      | <i>x</i><br>(Å) | <i>y</i><br>(Å) | <i>z</i><br>(Å) | <i>U</i> <sub>iso</sub> / <i>U</i> <sub>eq</sub><br>(Å <sup>2</sup> ) |
| Ho1                                                     | 8 <i>f</i>                            | 0.19327(3)      | 0.62397(4)      | 0.35845(2)      | 0.00947(13)                                                           |
| Ho2                                                     | 8 <i>f</i>                            | 0.57198(3)      | 0.74517(4)      | 0.53708(2)      | 0.00907(13)                                                           |
| Si                                                      | 8 <i>f</i>                            | 0.37353(18)     | 0.4098(3)       | 0.18132(15)     | 0.0085(4)                                                             |
| O1                                                      | 8 <i>f</i>                            | 0.3792(5)       | 0.5956(7)       | 0.4817(4)       | 0.0106(9)                                                             |
| O2                                                      | 8 <i>f</i>                            | 0.2994(5)       | 0.2135(7)       | 0.1181(4)       | 0.0098(9)                                                             |
| O3                                                      | 8 <i>f</i>                            | 0.4710(5)       | 0.3551(7)       | 0.2962(4)       | 0.0103(9)                                                             |
| O4                                                      | 8 <i>f</i>                            | 0.4472(5)       | 0.4999(7)       | 0.0900(4)       | 0.0134(10)                                                            |
| O5                                                      | 8 <i>f</i>                            | 0.2616(5)       | 0.5669(8)       | 0.2004(4)       | 0.0130(10)                                                            |

**Table S8.** Anisotropic displacement parameters obtained for the Ho and Si sites from the room temperature single crystal X-ray diffraction data collected on a crystal piece isolated from the as-grown Ho<sub>2</sub>SiO<sub>5</sub> crystal boule.

| Atomic site | <i>U</i> <sub>11</sub><br>(Å <sup>2</sup> ) | <i>U</i> <sub>22</sub><br>(Å <sup>2</sup> ) | <i>U</i> <sub>33</sub><br>(Å <sup>2</sup> ) | <i>U</i> <sub>12</sub><br>(Å <sup>2</sup> ) | <i>U</i> <sub>13</sub><br>(Å <sup>2</sup> ) | <i>U</i> <sub>23</sub><br>(Å <sup>2</sup> ) |
|-------------|---------------------------------------------|---------------------------------------------|---------------------------------------------|---------------------------------------------|---------------------------------------------|---------------------------------------------|
| Ho1         | 0.00913(18)                                 | 0.01037(19)                                 | 0.00891(19)                                 | 0.00041(10)                                 | 0.00195(12)                                 | 0.00127(10)                                 |
| Ho2         | 0.00905(18)                                 | 0.00903(19)                                 | 0.00921(19)                                 | 0.00049(10)                                 | 0.00216(13)                                 | 0.00079(10)                                 |
| Si          | 0.0091(8)                                   | 0.0089(8)                                   | 0.0075(9)                                   | −0.0011(6)                                  | 0.0017(7)                                   | −0.0002(6)                                  |

**Table S9.** Characteristics of the polyhedra formed around the Ho and Si, obtained from the room temperature single crystal X-ray diffraction data collected on a crystal piece isolated from the as-grown  $\text{Ho}_2\text{SiO}_5$  crystal boule. Data were obtained from VESTA software.

|                                          | Ho1O <sub>6</sub> |                   | Ho2O <sub>7</sub> | SiO <sub>4</sub> |                 |
|------------------------------------------|-------------------|-------------------|-------------------|------------------|-----------------|
| Average bond length (Å)                  | 2.2714            |                   | 2.3617            | 1.6268           |                 |
| Polyhedral volume (Å <sup>3</sup> )      | 14.5290           |                   | 18.7935           | 2.1950           |                 |
| Distortion index (bond length)           | 0.00994           |                   | 0.03090           | 0.00560          |                 |
| Quadratic elongation                     | 1.0498            |                   | -                 | 1.0044           |                 |
| Bond angle variance (deg. <sup>2</sup> ) | 175.6121          |                   | -                 | 18.2862          |                 |
| Effective coordination number            | 5.9537            |                   | 6.4507            | 3.9927           |                 |
| Bond valence sum                         | 3.078             |                   | 2.910             | 3.972            |                 |
| Ho1O <sub>6</sub>                        |                   | Ho2O <sub>7</sub> |                   | SiO <sub>4</sub> |                 |
| Bond                                     | Bond length (Å)   | Bond              | Bond length (Å)   | Bond             | Bond length (Å) |
| Ho1-O1                                   | 2.204(5)          | Ho2-O1            | 2.217(5)          | Si-O3            | 1.610(5)        |
| Ho1-O5                                   | 2.274(6)          | Ho2-O4            | 2.316(5)          | Si-O4            | 1.626(6)        |
| Ho1-O3                                   | 2.280(5)          | Ho2-O3            | 2.325(6)          | Si-O5            | 1.629(6)        |
| Ho1-O2                                   | 2.288(5)          | Ho2-O4            | 2.333(6)          | Si-O2            | 1.643(6)        |
| Ho1-O5                                   | 2.289(6)          | Ho2-O1            | 2.371(5)          |                  |                 |
| Ho1-O1                                   | 2.293(6)          | Ho2-O2            | 2.373(5)          |                  |                 |
|                                          |                   | Ho2-O2            | 2.596(6)          |                  |                 |

### 3. Crystal data for Er<sub>2</sub>SiO<sub>5</sub>

**Table S10.** Crystal parameters refined from the room temperature single crystal X-ray diffraction data collected on a crystal piece isolated from the as-grown Er<sub>2</sub>SiO<sub>5</sub> crystal boule.

|                                                         |                                       |  |  |  |  |
|---------------------------------------------------------|---------------------------------------|--|--|--|--|
| Chemical composition                                    | Er <sub>2</sub> SiO <sub>5</sub>      |  |  |  |  |
| Origin                                                  | as-grown crystal fragment             |  |  |  |  |
| Crystal system                                          | Monoclinic                            |  |  |  |  |
| Space group                                             | <i>I</i> 2/ <i>a</i> (No. 15)         |  |  |  |  |
| <i>a</i> (Å)                                            | 10.3690(3)                            |  |  |  |  |
| <i>b</i> (Å)                                            | 6.7028(2)                             |  |  |  |  |
| <i>c</i> (Å)                                            | 12.4640(3)                            |  |  |  |  |
| $\beta$ (°)                                             | 102.533(3)                            |  |  |  |  |
| <i>V</i> (Å <sup>3</sup> )                              | 845.62(4)                             |  |  |  |  |
| <i>Z</i>                                                | 8                                     |  |  |  |  |
| Radiation, wavelength                                   | Mo K $\alpha$ , $\lambda$ = 0.71073 Å |  |  |  |  |
| Temperature (K)                                         | 298                                   |  |  |  |  |
| Linear absorption coefficient (mm <sup>−1</sup> )       | 29.709                                |  |  |  |  |
| No. of reflections measured (excl. systematic absences) | 8808                                  |  |  |  |  |
| No. of reflections used in refinement                   | 1092                                  |  |  |  |  |
| No. of parameters refined                               | 49                                    |  |  |  |  |
| R1                                                      | 0.0392                                |  |  |  |  |
| wR2                                                     | 0.0790                                |  |  |  |  |
| Goodness of fit (GOF)                                   | 1.0149                                |  |  |  |  |

  

| Atomic site | Wyckoff position | <i>x</i><br>(Å) | <i>y</i><br>(Å) | <i>z</i><br>(Å) | <i>U</i> <sub>iso</sub> / <i>U</i> <sub>eq</sub><br>(Å <sup>2</sup> ) |
|-------------|------------------|-----------------|-----------------|-----------------|-----------------------------------------------------------------------|
| Er1         | 8 <i>f</i>       | 0.80609(4)      | 0.62370(6)      | 0.64137(3)      | 0.01011(16)                                                           |
| Er2         | 8 <i>f</i>       | 0.42845(4)      | 0.74490(6)      | 0.46292(3)      | 0.00969(16)                                                           |
| Si          | 8 <i>f</i>       | 0.6258(2)       | 0.4092(4)       | 0.8185(2)       | 0.0099(5)                                                             |
| O1          | 8 <i>f</i>       | 0.6206(6)       | 0.5961(10)      | 0.5180(5)       | 0.0112(13)                                                            |
| O2          | 8 <i>f</i>       | 0.5274(6)       | 0.3549(9)       | 0.7030(5)       | 0.0082(12)                                                            |
| O3          | 8 <i>f</i>       | 0.7018(6)       | 0.2148(10)      | 0.8819(5)       | 0.0102(13)                                                            |
| O4          | 8 <i>f</i>       | 0.5516(6)       | 0.4977(10)      | 0.9107(5)       | 0.0124(13)                                                            |
| O5          | 8 <i>f</i>       | 0.7377(6)       | 0.5685(10)      | 0.7992(5)       | 0.0132(13)                                                            |

**Table S11.** Anisotropic displacement parameters obtained for the Er and Si sites from the room temperature single crystal X-ray diffraction data collected on a crystal piece isolated from the as-grown Er<sub>2</sub>SiO<sub>5</sub> crystal boule.

| Atomic site | <i>U</i> <sub>11</sub><br>(Å <sup>2</sup> ) | <i>U</i> <sub>22</sub><br>(Å <sup>2</sup> ) | <i>U</i> <sub>33</sub><br>(Å <sup>2</sup> ) | <i>U</i> <sub>12</sub><br>(Å <sup>2</sup> ) | <i>U</i> <sub>13</sub><br>(Å <sup>2</sup> ) | <i>U</i> <sub>23</sub><br>(Å <sup>2</sup> ) |
|-------------|---------------------------------------------|---------------------------------------------|---------------------------------------------|---------------------------------------------|---------------------------------------------|---------------------------------------------|
| Er1         | 0.0094(2)                                   | 0.0115(3)                                   | 0.0093(2)                                   | −0.00032(15)                                | 0.00177(16)                                 | −0.00115(15)                                |
| Er2         | 0.0091(2)                                   | 0.0101(3)                                   | 0.0099(2)                                   | −0.00048(14)                                | 0.00220(16)                                 | −0.00091(14)                                |
| Si          | 0.0083(11)                                  | 0.0128(13)                                  | 0.0081(11)                                  | 0.0007(9)                                   | 0.0008(9)                                   | −0.0005(9)                                  |

**Table S12.** Characteristics of the polyhedra formed around the Er and Si, obtained from the room temperature single crystal X-ray diffraction data collected on a crystal piece isolated from the as-grown Er<sub>2</sub>SiO<sub>5</sub> crystal boule. Data were obtained using VESTA software.

|                                          | ErO <sub>6</sub> |  | ErO <sub>7</sub> | SiO <sub>4</sub> |  |
|------------------------------------------|------------------|--|------------------|------------------|--|
| Average bond length (Å)                  | 2.2596           |  | 2.3491           | 1.6275           |  |
| Polyhedral volume (Å <sup>3</sup> )      | 14.2959          |  | 18.5039          | 2.1962           |  |
| Distortion index (bond length)           | 0.00965          |  | 0.03284          | 0.00386          |  |
| Quadratic elongation                     | 1.0502           |  | -                | 1.0049           |  |
| Bond angle variance (deg. <sup>2</sup> ) | 176.9839         |  | -                | 20.1620          |  |
| Effective coordination number            | 5.9541           |  | 6.3967           | 3.9969           |  |
| Bond valence sum                         | 3.067            |  | 2.917            | 3.963            |  |

  

| ErO <sub>6</sub> |                 | ErO <sub>7</sub> |                 | SiO <sub>4</sub> |                 |
|------------------|-----------------|------------------|-----------------|------------------|-----------------|
| Bond             | Bond length (Å) | Bond             | Bond length (Å) | Bond             | Bond length (Å) |
| Er1-O1           | 2.194(6)        | Er2-O1           | 2.200(7)        | Si-O2            | 1.615(7)        |
| Er1-O2           | 2.261(6)        | Er2-O4           | 2.292(7)        | Si-O4            | 1.627(8)        |
| Er1-O5           | 2.262(7)        | Er2-O2           | 2.312(7)        | Si-O5            | 1.633(8)        |
| Er1-O5           | 2.271(7)        | Er2-O4           | 2.322(7)        | Si-O3            | 1.635(7)        |
| Er1-O1           | 2.283(7)        | Er2-O3           | 2.357(6)        |                  |                 |
| Er1-O3           | 2.287(7)        | Er2-O1           | 2.365(7)        |                  |                 |
|                  |                 | Er2-O3           | 2.596(7)        |                  |                 |

**Disclaimer/Publisher's Note:** The statements, opinions and data contained in all publications are solely those of the individual author(s) and contributor(s) and not of MDPI and/or the editor(s). MDPI and/or the editor(s) disclaim responsibility for any injury to people or property resulting from any ideas, methods, instructions or products referred to in the content.
